# Supplementary material for: Quantum well thickness control of a hybrid perovskite to achieve a tunable anisotropic photoresponse
Source: Royal Society of Chemistry journal article supplement (doi:10.1039/d4tc02656j), 2024-01-01
Supplement: d4tc02656j1.pdf [file d4tc02656j1.pdf]

## Supporting Information

### **Quantum Well Thickness Control of Hybrid Perovskite to Achieve Tunable Anisotropic Photoresponse**

*Cheng-Dong Liu,<sup>‡</sup> Chang-Chun Fan,<sup>‡</sup> Bei-Dou Liang, Wei Wang, Ming-Liang Jin, Chang-Qing Jing, Jing-Meng Zhang, and Wen Zhang\**

Jiangsu Key Laboratory for Science and Applications of Molecular Ferroelectrics and School of Chemistry and Chemical Engineering, Southeast University, Nanjing 211189, China.

E-mail: zhangwen@seu.edu.cn

## Experimental Section

### Materials and general characterizations.

2-Thiophenemethylamine (2TMA, 99%), lead acetate ( $\text{Pb}(\text{Ac})_2$ , 99.9%), hydroiodic acid (HI, 48 wt.% in  $\text{H}_2\text{O}$ ), Methylamine hydrochloride (MACl, 99.9%) and hypophosphorous acid ( $\text{H}_3\text{PO}_2$  48 wt.% in  $\text{H}_2\text{O}$ ) were commercially available and used as received without further purification.

Powder X-ray diffraction (PXRD) patterns were obtained on a Rigaku SmartLab X-ray diffraction instrument. Ultraviolet-visible (UV-vis) absorption spectra were measured with Shimadzu UV-2600 equipped with ISR-2600Plus integrating sphere. The single crystal growth was carried out using a home-made hydrothermal growth system.

### Materials Synthesis.

The 2TM-n single crystal was synthesized in the concentrated HI solution, containing fixed 2TMA, and the stoichiometric ratio of  $\text{Pb}(\text{Ac})_2$  and MACl with an increasing number of layers. The resulting solution was cooled down gradually to 370 K to obtain a saturated solution. Then it was cooled down to 273 K at the rate of 20 K/day, resulting in tiny single crystals. By changing the cooling rate to 2 K/day, the large block crystals can be obtained.

**Table S1.** Reagent quantities used for 2TM-n single-crystal synthesis.

|                          | 2TM-1   | 2TM-2   | 2TM-3    |
|--------------------------|---------|---------|----------|
| $\text{Pb}(\text{Ac})_2$ | 5 mmol  | 10 mmol | 10 mmol  |
| HI                       | 30 mL   | 30 mL   | 30 mL    |
| $\text{H}_3\text{PO}_2$  | 3 mL    | 3 mL    | 3 mL     |
| MACl                     | /       | 5 mmol  | 7.5 mmol |
| 2TMA                     | 10 mmol | 5 mmol  | 2.5 mmol |

**Device fabrication.** The single-crystal device for photodetection was made by coating silver conducting paste on the crystal surface.

**I-V measurement.** The photocurrent was measured by FS380 (Primarius). The LEDs were obtained from Thorlabs. The polarizer (Glan-Taylor prism) converts the LED laser beam into polarized light, and the polarization angle of the polarized light is then adjusted by a half-wave plate.

**Theoretical calculations.** DFT calculations were conducted by using VASP. Projector augmented wave method was adopted to define the ion-electron interactions. The exchange-correlation interaction was expressed by the PBE functional within the generalized gradient approximation. Grimme's dispersion-corrected semi-empirical DFT-D3 method was employed to evaluate van der Waals interactions. Energy cutoff of 500 eV and a  $2 \times 2 \times 4$  Monkhorst-Pack grid of k-points were used. VASPKIT was employed to perform post-processing analysis.<sup>[1]</sup>

#### Note S1.

The optical and electric anisotropy caused by the distinct charge density distribution of 2TM-n can be explained from the Fermi Golden Rule. We can get the electric dipole transition probability  $R$  for photon absorption per unit time:

$$R = \left( \frac{2\pi}{\hbar} \right) \sum_{k_c, k_v} |\langle c | H_{eR} | v \rangle|^2 \delta(E_c(k_c) - E_v(k) - \hbar\omega)$$

The  $|v\rangle$  represents valence band state with energy  $E_v$  and wavevector  $k_v$ , and the  $|c\rangle$  represents conduction band state with energy  $E_c$  and wavevector  $k_c$ . The matrix element  $|\langle c | H_{eR} | v \rangle|^2$  can

be calculated as  $|\langle c | H_{eR} | v \rangle|^2 = \left( \frac{e}{mc} \right)^2 |\langle c | \mathbf{A} \cdot \mathbf{P} | v \rangle|^2$ , where  $\mathbf{P}$  is the momentum operator and  $\mathbf{A}$  is

a vector potential. The amplitude of  $\mathbf{A}$  can be written as  $\mathbf{A} = -\frac{E}{2q} \{ \exp[i(q \cdot \mathbf{r} - \omega t)] + c.c. \}$ , where

*c.c.* stands for complex conjugate. The charge density distribution in the in-plane and out-of-

plane direction is obviously different, which causes  $|\langle c | H_{eR} | v \rangle|$  to have different integral values

in the two directions. This also eventually results in different  $R$  for photon absorption per unit

time in both the in-plane and out-of-plane direction, which demonstrates that the anisotropic

polarized absorption of 2TM-n dominantly originates from the structural anisotropy.<sup>[2]</sup>



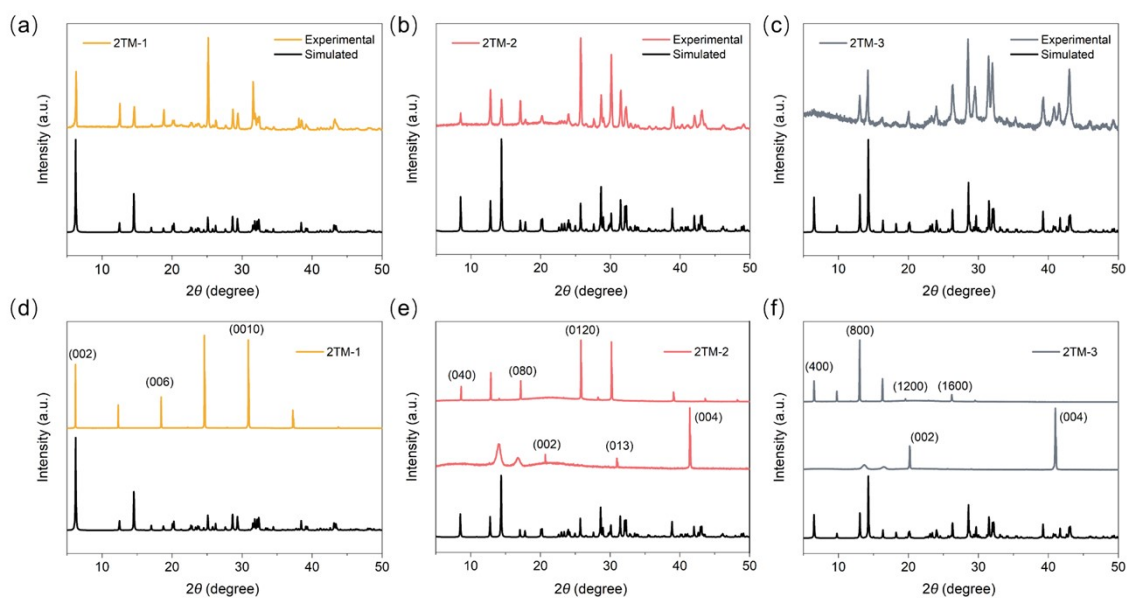

**Fig. S1.** PXRD patterns of (a, d) 2TM-1, (b, e) 2TM-2 and (c, f) 2TM-3.

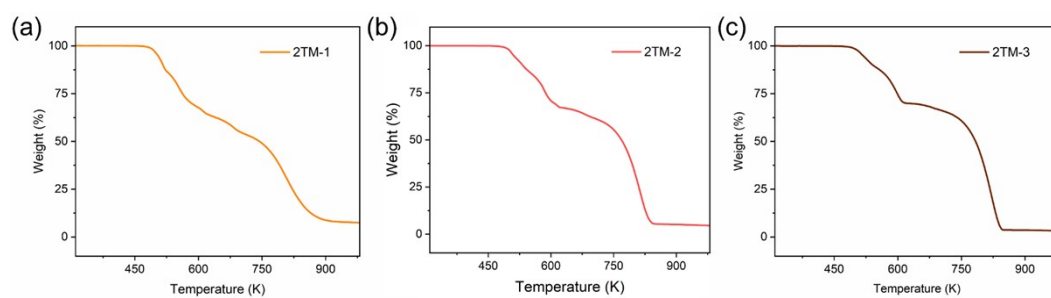

**Fig. S2.** Thermogravimetric analysis of (a) 2TM-1, (b) 2TM-2 and (c) 2TM-3.

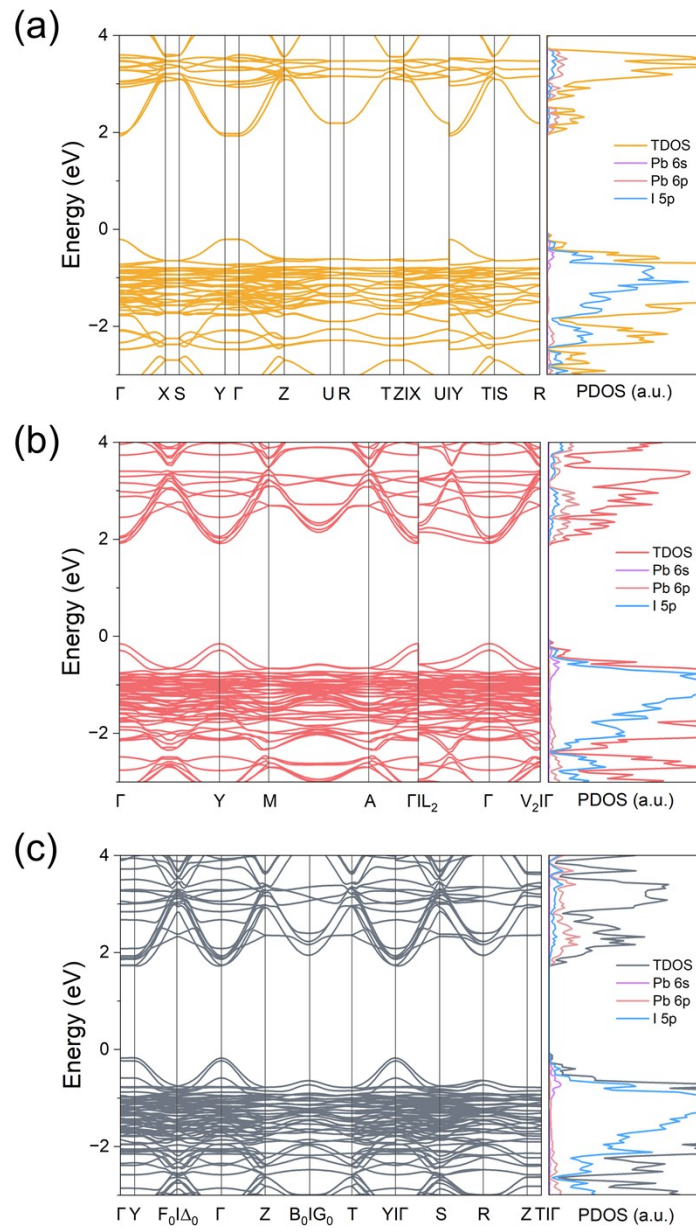

**Fig. S3.** Calculated band structures of (a) 2TM-1, (b) 2TM-2, and (c) 2TM-3.

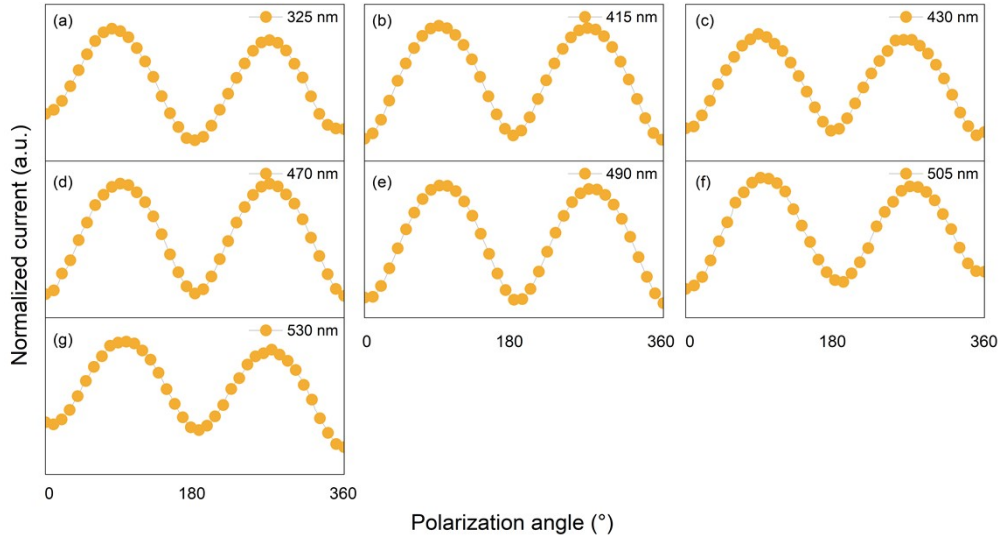

**Fig. S4.** Angle-dependent photocurrent of 2TM-1 measured at different wavelengths.

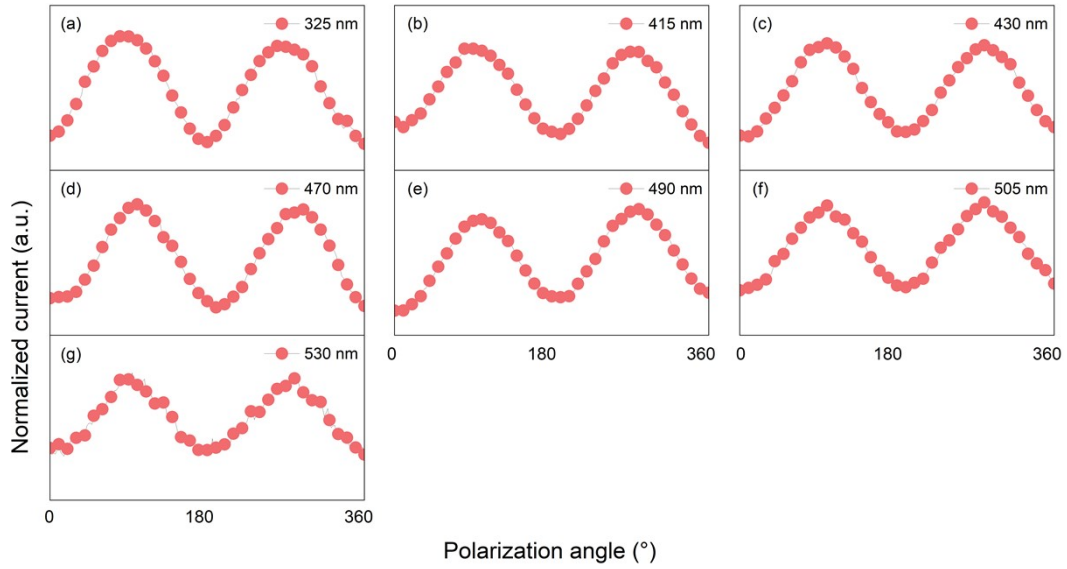

**Fig. S5.** Angle-dependent photocurrent of 2TM-2 measured at different wavelengths.

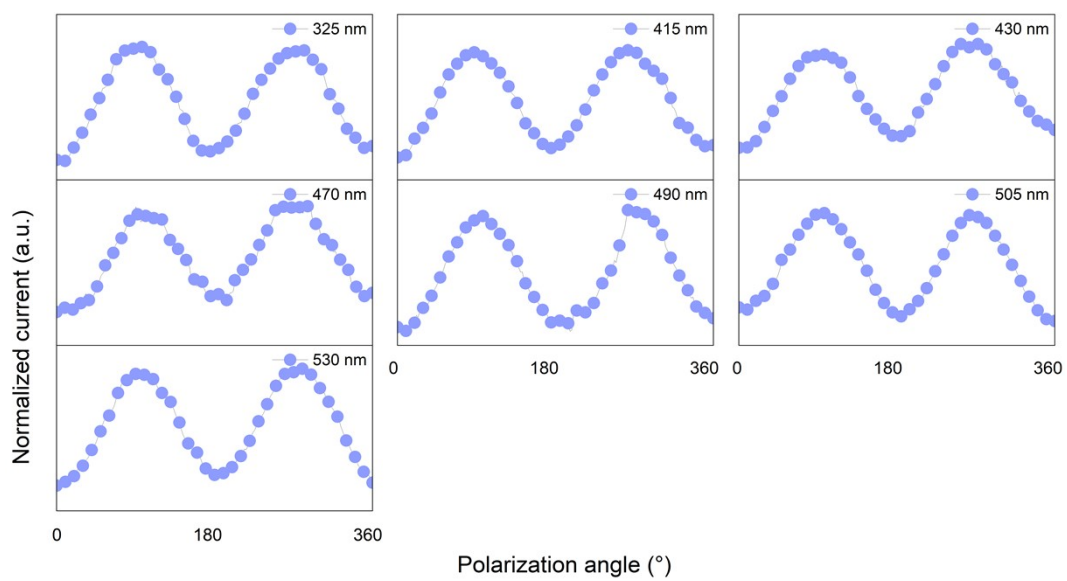

**Fig. S6.** Angle-dependent photocurrent of 2TM-3 measured at different wavelengths.

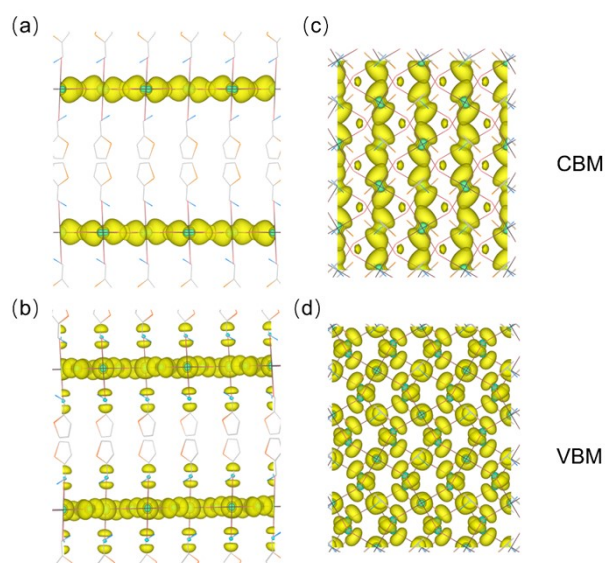

**Fig. S7.** Calculated CBM and VBM partial charge densities of 2TM-1.



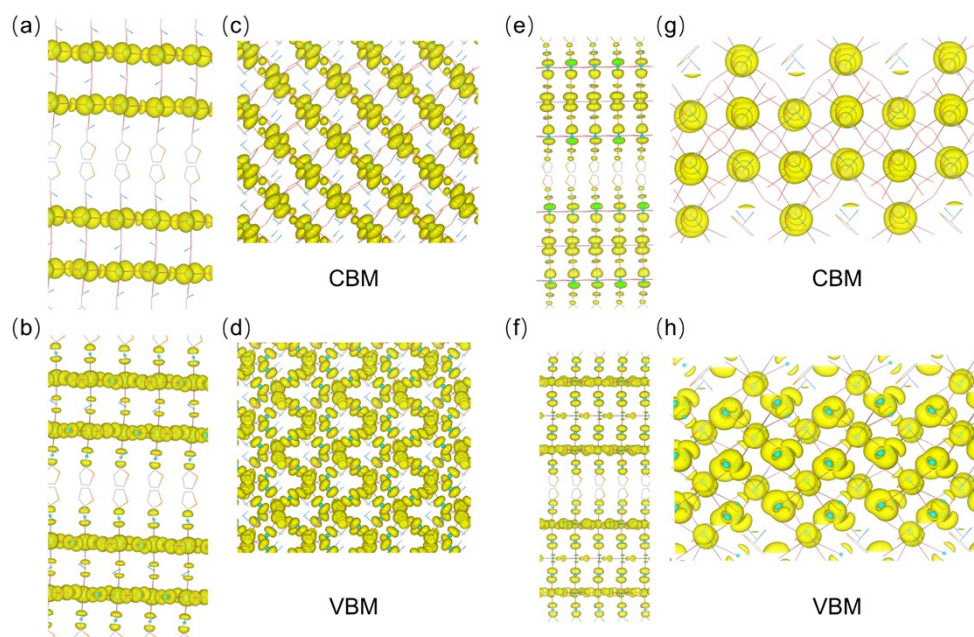

**Fig. S8.** Calculated CBM and VBM partial charge densities of (a-d) 2TM-2 and (e-f) 2TM-3.

## Reference

- [1] a) J. P. Perdew, K. Burke, M. Ernzerhof, *Phys. Rev. Lett.* **1996**, 77, 3865; b) H. J. Monkhorst, J. D. Pack, *Phys. Rev. B* **1976**, 13, 5188; c) J. Paier, M. Marsman, K. Hummer, G. Kresse, I. C. Gerber, J. G. Angyan, *J. Chem. Phys.* **2006**, 124, 154709; d) V. Wang, N. Xu, J. C. Liu, G. Tang, W. T. Geng, *Comput. Phys. Commun.* **2021**, 267, 19, 108033.
- [2] a) H. Yang, L. Pan, X. Wang, H. X. Deng, M. Zhong, Z. Zhou, Z. Lou, G. Shen, Z. Wei, *Adv. Funct. Mater.* **2019**, 29, 1904416; b) Z. Zhou, M. Long, L. Pan, X. Wang, M. Zhong, M. Blei, J. Wang, J. Fang, S. Tongay, W. Hu, J. Li, Z. Wei, *ACS Nano* **2018**, 12, 12416.
